# Supplementary material
Source: Springer Nature journal article supplement (https://www.springermedizin.de/resource/supplementary/40248_2012_53_MOESM4_ESM.pdf/9686016)

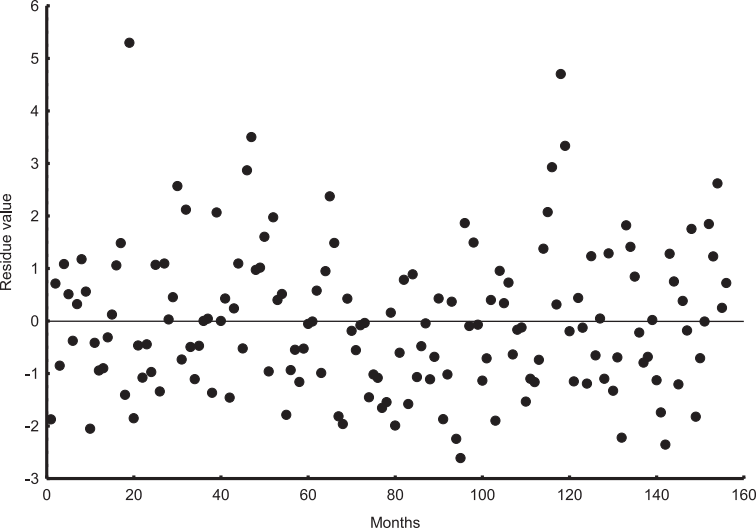

Supplement: MOESM4 [file 9686016]
